# Supplementary material
Source: MDPI journal article supplement (https://www.mdpi.com/2411-5134/4/4/72)
Supplement: s1 [file s1]

## Supplementary Methods.

*Image preprocessing procedure to emphasize green signals.*

1) By using ImageMagick, reduce colours (gray, green, red and blue) to remove background and edge of fish.

Open the images and command “convert.exe input.jpg –colors 4 output.jpg”.

Representative image after ImageMagick procedure.

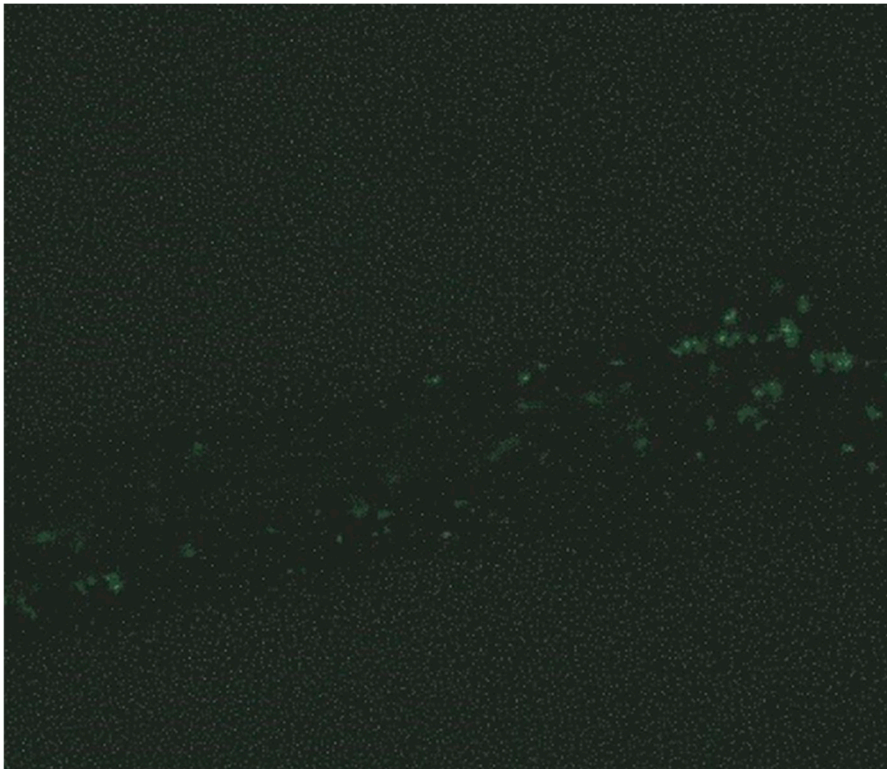

\* At that time, the Tiff images were also converted to Jpg which suitable for Auto-ML uploading.

2) By using GIMP, reduce noise (small dots) in the background.

Open the ImageMagick processed images and apply thresholds from color menu.

\* Decide the threshold value to diminish the noise (“Auto” is recommended).

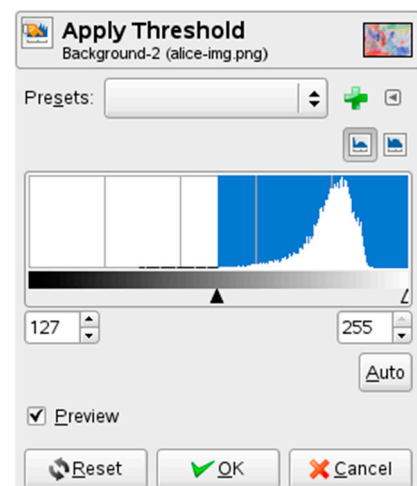

Representative image after GIMP procedure.

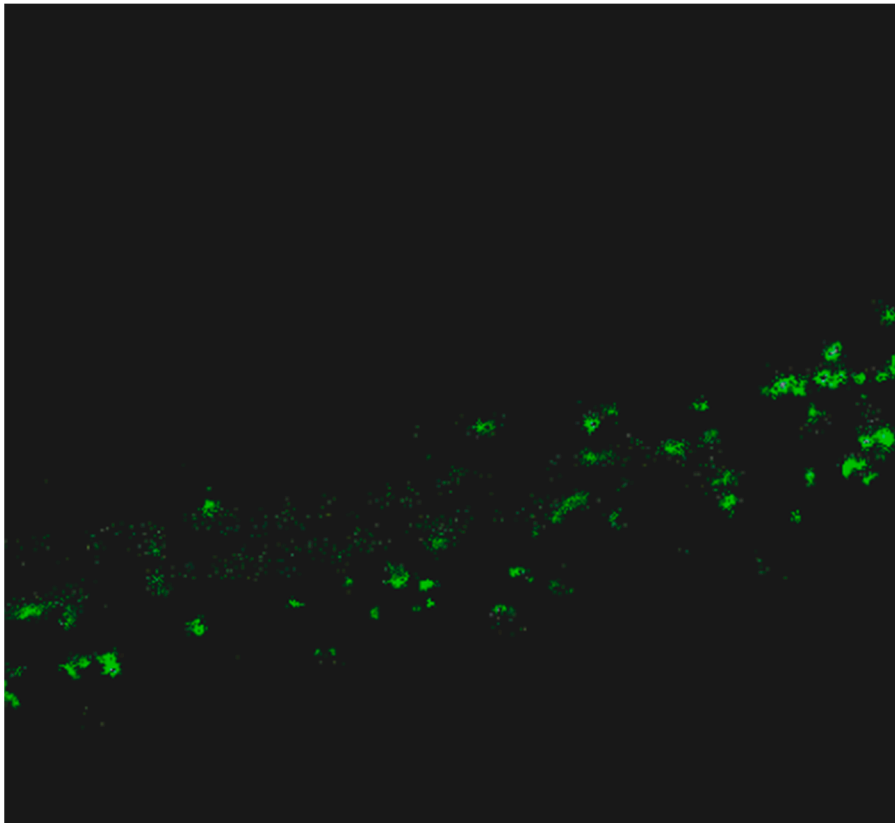

## Supplemental Figures

**Figure S1.** Manual prediction of normal and abnormal phenotypes in zebrafish treated with 0.5  $\mu$ M sorafenib.

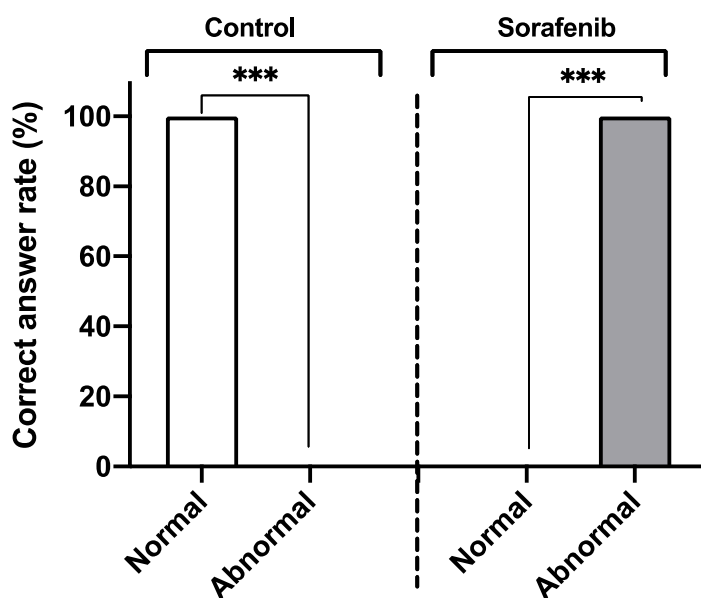

n=3, error bars indicate SE. \*\*\*p < 0.001.

**Figure S2.** Manual prediction of normal and abnormal phenotypes of zebrafish treated with sorafenib in a dose-dependent manner.

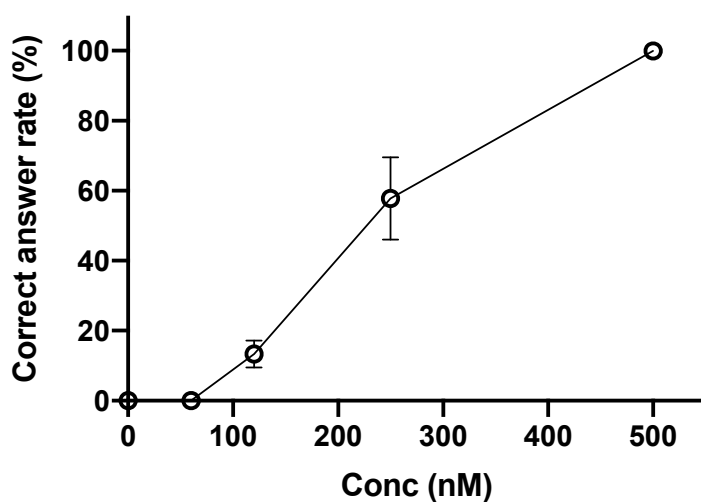

n=3, error bars indicate SE.

**Figure S3.** Manual prediction of normal and abnormal phenotypes in wounded zebrafish.

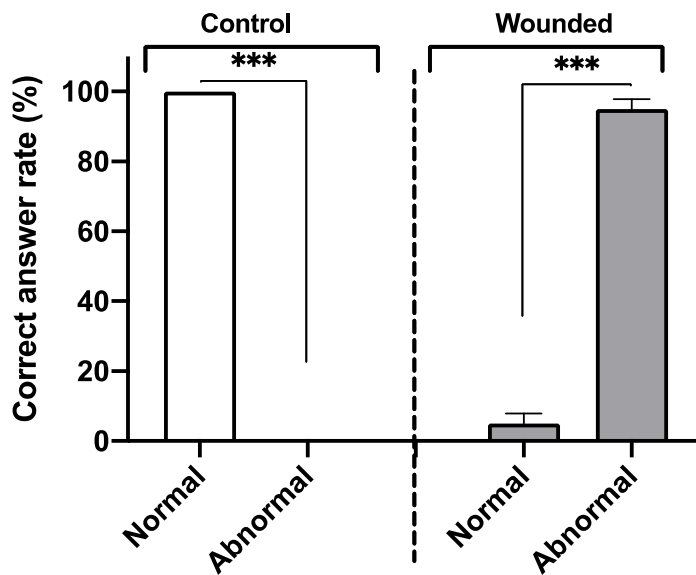

n=3, error bars indicate SE. \*\*\*p < 0.001.

**Figure S4.** Repeated training of AutoML with the same images did not affect the prediction accuracies in vascular-EGFP zebrafish.

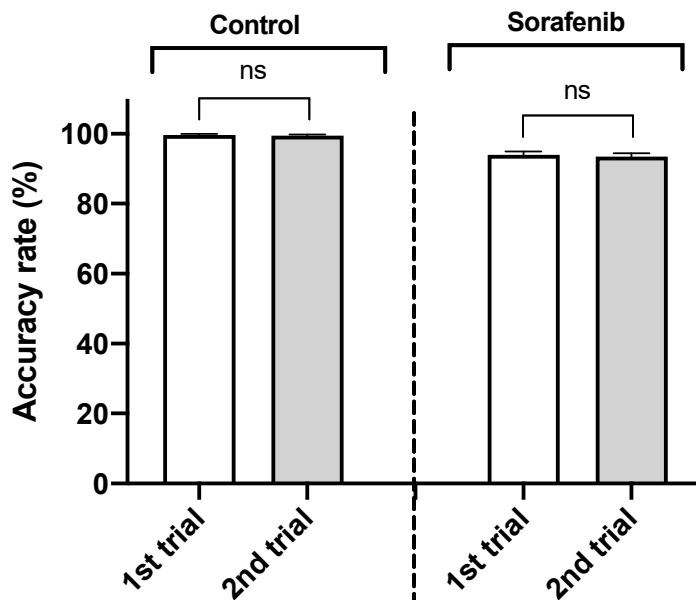

The percentage of “predicted as normal” in 1st trial (Fig. 1c) and 2nd trial of control group is  $99.7 \pm 0.2\%$  and  $99.5 \pm 0.3\%$ , respectively, while the percentage of “predict as abnormal” in 1st trial (Fig. 1c) and 2nd trial of control group is  $94.0 \pm 0.9\%$  and  $93.4 \pm 1.0\%$ , respectively. n=20, error bars indicate SEM.
