# Supplementary material
Source: MDPI journal article supplement (https://www.mdpi.com/2411-5134/4/4/72)
Supplement: s1 [file s1]

Archive with 2 entries (2 files):
- inventions-649002-SI.pdf
- video_S1.mp4
